# Supplementary material for: Analyzing the gene expression profile of anaplastic histology Wilms’ tumor with real-time polymerase chain reaction arrays
Source: Springer Nature journal article supplement (doi:10.1186/s12935-015-0197-x), 2015-04-18
Supplement: MOESM2 [file 9760720]

Analysis Name: API-1-WT - 2012-09-07 10:33

Analysis Creation Date: 2012-09-07

Build version: 172788

Content version: 14197757 (Release Date: 2012-08-11)

## Analysis settings

### [View](#)

Reference set: Ingenuity Knowledge Base (Genes Only)

Relationship to include: Direct and Indirect

Includes Endogenous Chemicals

Optional Analyses: My Pathways My List

### Filter Summary:

Consider only molecules and/or relationships where

(species = Uncategorized (e.g. chemicals) OR Human) AND

(confidence = Experimentally Observed) AND

(tissues/cell lines = Macrophages OR Adipose OR Monocyte-derived macrophage OR Vd2 Gamma-delta T cells OR Salivary Gland OR CD56dim NK cells OR Memory B cells OR Activated Vd1 Gamma-delta T cells OR Naive B cells OR Placenta OR Plasmacytoid dendritic cells OR Liver OR Jurkat OR Cytotoxic T cells OR Mammary Gland OR SR OR Spleen OR Natural T-regulatory cells OR Activated helper T cells OR Naive helper T cells OR BDCA-1+ dendritic cells OR Skeletal Muscle OR HL-60 OR Central memory cytotoxic T cells OR Pancreas OR Testis OR Kidney OR K-562 OR Other Tissues and Primary Cells OR Prostate Gland OR RAW 264.7 OR Activated CD56bright NK cells OR MOLT-4 OR Thymus OR Epidermis OR CD56bright NK cells OR Effector memory RA+ cytotoxic T cells OR Effector memory cytotoxic T cells OR Monocytes OR Effector T cells OR Vd1 Gamma-delta T cells OR Activated CD56dim NK cells OR Central memory helper T cells OR Neutrophils OR Lung OR Uterus OR Immature monocyte-derived dendritic cells OR Murine NKT cells OR Retina OR Large Intestine OR Effector memory

helper T cells OR THP-1 OR BDCA-3+ dendritic cells OR Th1 cells OR Activated Vd2 Gamma-delta T cells OR Th2 cells OR Small Intestine OR Mature monocyte-derived dendritic cells OR Bladder OR CCRF-CEM OR Heart OR Ovary OR Stomach) AND  
(data sources = BIND OR BIOGRID OR Cognition OR DIP OR Ingenuity Expert Findings OR Ingenuity ExpertAssist Findings OR INTACT OR Interactome studies OR MINT OR MIPS OR TarBase)

## Top Networks

| ID | Associated Network Functions                                                                               | Score |
|----|------------------------------------------------------------------------------------------------------------|-------|
| 1  | Cancer, Hematological Disease, Gene Expression                                                             | 43    |
| 2  | Cellular Development, Embryonic Development, Cancer                                                        | 13    |
| 3  | Connective Tissue Development and Function, Embryonic Development, Nervous System Development and Function | 7     |

## Top Bio Functions

### Diseases and Disorders

| Name                        | p-value             | # Molecules |
|-----------------------------|---------------------|-------------|
| Cancer                      | 9.76E-14 - 1.11E-02 | 27          |
| Reproductive System Disease | 9.76E-14 - 8.68E-03 | 21          |
| Respiratory Disease         | 5.81E-12 - 1.08E-02 | 14          |
| Gastrointestinal Disease    | 1.21E-11 - 1.08E-02 | 20          |
| Hepatic System Disease      | 1.21E-11 - 9.28E-03 | 14          |

### Molecular and Cellular Functions

| Name                                       | p-value             | # Molecules |
|--------------------------------------------|---------------------|-------------|
| Cell Death and Survival                    | 1.15E-12 - 8.68E-03 | 18          |
| Cellular Development                       | 2.84E-11 - 8.68E-03 | 15          |
| Cellular Growth and Proliferation          | 2.84E-11 - 1.12E-02 | 16          |
| Gene Expression                            | 4.43E-10 - 8.68E-03 | 20          |
| DNA Replication, Recombination, and Repair | 1.39E-07 - 1.08E-02 | 12          |

### Physiological System Development and Function

| Name                                                 | p-value             | # Molecules |
|------------------------------------------------------|---------------------|-------------|
| Tumor Morphology                                     | 1.02E-06 - 1.08E-02 | 8           |
| Embryonic Development                                | 1.78E-05 - 1.08E-02 | 15          |
| Renal and Urological System Development and Function | 3.27E-05 - 1.08E-02 | 10          |
| Organismal Survival                                  | 5.85E-05 - 1.08E-02 | 7           |
| Cardiovascular System Development and Function       | 9.55E-05 - 7.99E-03 | 10          |

## Top Canonical Pathways

| Name                                   | p-value  | Ratio         |
|----------------------------------------|----------|---------------|
| p53 Signaling                          | 8.88E-10 | 7/96 (0.073)  |
| Huntington's Disease Signaling         | 4.5E-06  | 6/232 (0.026) |
| Molecular Mechanisms of Cancer         | 5.47E-06 | 7/372 (0.019) |
| Colorectal Cancer Metastasis Signaling | 8.47E-06 | 6/250 (0.024) |
| Pancreatic Adenocarcinoma Signaling    | 7.45E-05 | 4/119 (0.034) |

## Top Molecules

### Fold Change up-regulated

| Molecules | Exp. Value | Exp. Chart |
|-----------|------------|------------|
| APC       | ↑1.000     |            |
| BCL2L1    | ↑1.000     |            |
| BIRC5     | ↑1.000     |            |
| CASP1     | ↑1.000     |            |
| CASP4     | ↑1.000     |            |
| CCL5      | ↑1.000     |            |
| CDKN1C    | ↑1.000     |            |
| DNMT3A    | ↑1.000     |            |
| HDAC7     | ↑1.000     |            |
| IGF2      | ↑1.000     |            |

### Fold Change down-regulated

| Molecules | Exp. Value | Exp. Chart |
|-----------|------------|------------|
| WT1       | ↓-1.000    |            |
| TP73      | ↓-1.000    |            |
| TIMP1     | ↓-1.000    |            |

|       |         |
|-------|---------|
| PCNA  | ↓-1.000 |
| MEIS2 | ↓-1.000 |
| JUN   | ↓-1.000 |
| ID4   | ↓-1.000 |
| ID1   | ↓-1.000 |
| HOXA4 | ↓-1.000 |
| HOXA3 | ↓-1.000 |

### Top Upstream Regulators

| Upstream Regulator        | p-value of overlap | Predicted Activation State |
|---------------------------|--------------------|----------------------------|
| TP53 (includes EG:22059)  | 1.15E-14           | Inhibited                  |
| phorbol myristate acetate | 2.94E-14           |                            |
| EGF                       | 2.27E-13           |                            |
| TGFB1                     | 3.79E-13           |                            |
| Tgf beta                  | 9.50E-13           |                            |

## Top My Lists

| Name                           | p-value  | Ratio        |
|--------------------------------|----------|--------------|
| Direct players of IL24         | 4.27E-02 | 1/21 (0.048) |
| BIOMARKERS HNC and mouse HPV16 | 1.89E-01 | 1/100 (0.01) |

## Top My Pathways

| Name                    | p-value  | Ratio         |
|-------------------------|----------|---------------|
| IL24 pic                | 1.5E-04  | 3/54 (0.056)  |
| Networks 13,3 Merged 2  | 1.23E-03 | 2/50 (0.04)   |
| Merged networks         | 1.15E-02 | 2/269 (0.007) |
| FASN malignancy pathway | 1.6E-02  | 2/142 (0.014) |

## Top Tox Lists

| Name                        | p-value  | Ratio         |
|-----------------------------|----------|---------------|
| p53 Signaling               | 1.03E-09 | 7/95 (0.074)  |
| Cardiac Necrosis/Cell Death | 3.09E-06 | 6/193 (0.031) |
| Renal Necrosis/Cell Death   | 1.19E-05 | 7/374 (0.019) |
| Hepatic Fibrosis            | 4.44E-05 | 4/92 (0.043)  |
| Liver Necrosis/Cell Death   | 1.3E-04  | 5/232 (0.022) |

## Top Tox Functions

### Cardiotoxicity

| Name                        | p-value             | # Molecules |
|-----------------------------|---------------------|-------------|
| Cardiac Necrosis/Cell Death | 1.88E-05 - 1.73E-02 | 4           |
| Cardiac Stenosis            | 2.61E-03 - 1.51E-02 | 2           |
| Cardiac Infarction          | 4.35E-03 - 4.35E-03 | 1           |
| Cardiac Arrhythmia          | 2.71E-02 - 1.64E-01 | 2           |

### Hepatotoxicity

| Name                                 | p-value             | # Molecules |
|--------------------------------------|---------------------|-------------|
| Liver Hyperplasia/Hyperproliferation | 1.21E-11 - 9.16E-02 | 13          |
| Hepatocellular Carcinoma             | 2.24E-10 - 9.16E-02 | 12          |
| Liver Necrosis/Cell Death            | 6.16E-06 - 2.58E-02 | 4           |
| Liver Hepatitis                      | 6.33E-04 - 8.36E-02 | 3           |
| Liver Proliferation                  | 3.56E-03 - 6.54E-02 | 2           |

### Nephrotoxicity

| Name                      | p-value             | # Molecules |
|---------------------------|---------------------|-------------|
| Renal Necrosis/Cell Death | 2.86E-05 - 3.01E-02 | 7           |
| Renal Proliferation       | 3.27E-05 - 5.10E-02 | 5           |
| Glomerular Injury         | 1.67E-03 - 2.18E-03 | 2           |
| Kidney Failure            | 2.18E-03 - 9.82E-03 | 2           |
| Renal Inflammation        | 2.37E-02 - 3.64E-02 | 2           |
